# Supplementary material for: Novel amino-cyclodextrin cross-linked oligomer as efficient carrier for anionic drugs: a spectroscopic and nanocalorimetric investigation
Source: Royal Society of Chemistry journal article supplement (doi:10.1039/c4ra16064a), 2015-01-01
Supplement: c4ra16064a1.pdf [file c4ra16064a1.pdf]

## Novel amino-cyclodextrin cross-linked oligomer as efficient carrier for anionic drugs: a spectroscopic and nanocalorimetric investigation

Valentina Giglio,<sup>a</sup> Carmelo Sgarlata,<sup>a,b</sup> Graziella Vecchio<sup>a</sup>

<sup>a</sup> *Dipartimento di Scienze Chimiche, Università degli Studi di Catania, V.le A. Doria 6, 95125 Catania, Italy*

<sup>b</sup> *Consorzio I.N.B.B., Viale delle Medaglie d'Oro 305, 00136, Roma, Italy*

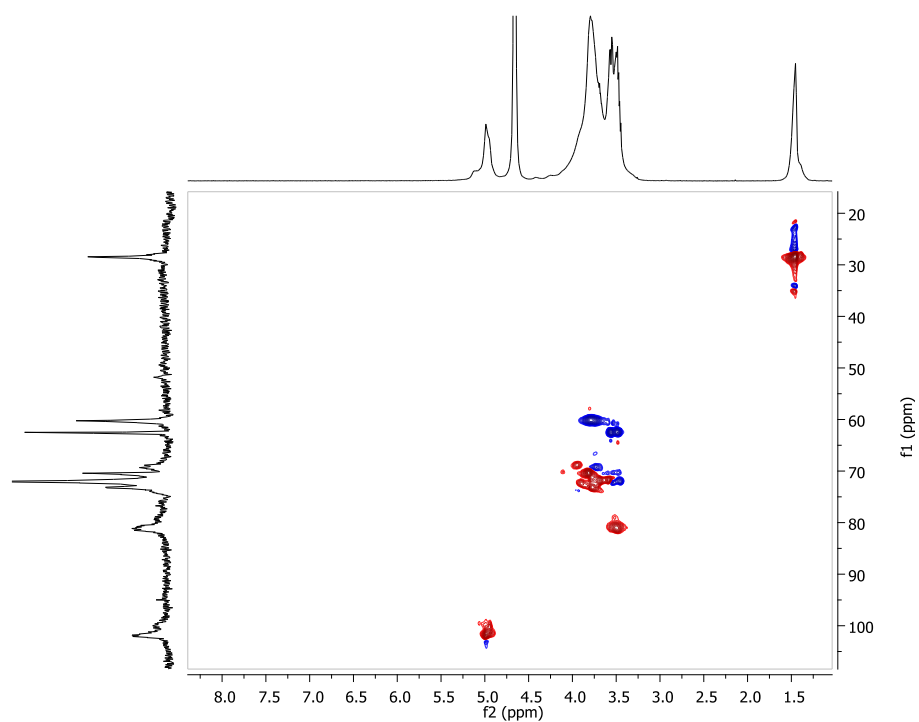

**Fig. S1** gHSQC spectrum ( $D_2O$ , 500 MHz) of pCyDNHBoc

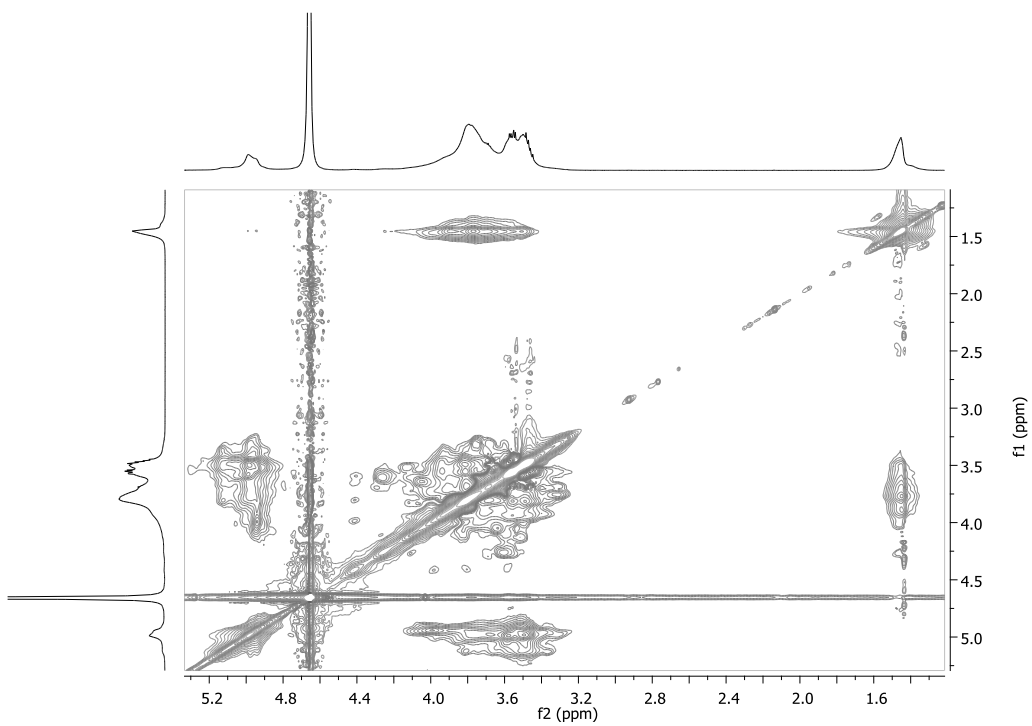

**Fig. S2** ROESY spectrum ( $D_2O$ , 500 MHz) of pCyDNHBoc

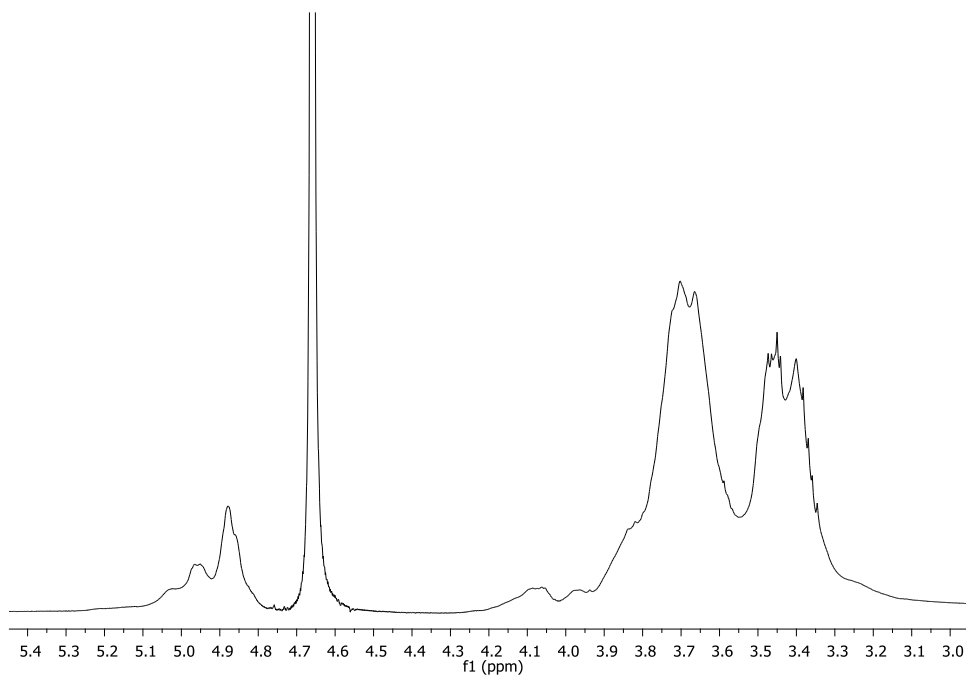

**Fig. S3**  $^1H$  NMR spectrum ( $D_2O$ , 500 MHz) of pCyDNH<sub>2</sub>

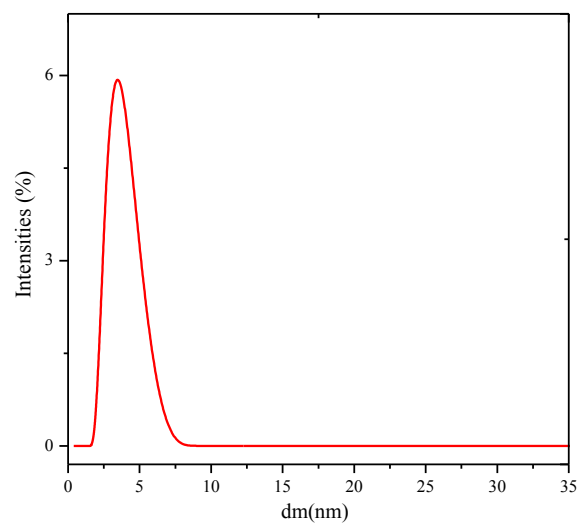

**Fig. S4** Size distribution of pCyDNHBoc in Tris buffer (pH 7.4) determined by DLS
